# Supplementary material
Source: Springer Nature journal article supplement (https://www.springermedizin.de/resource/supplementary/12916_2011_516_MOESM1_ESM.pdf/9598068)
Supplement: MOESM1 [file 9598068]

| Drug candidate                                                                  | Chemical structure                                                                  | Activity Targeted | Phase of development       |
|---------------------------------------------------------------------------------|-------------------------------------------------------------------------------------|-------------------|----------------------------|
| RAL                                                                             | 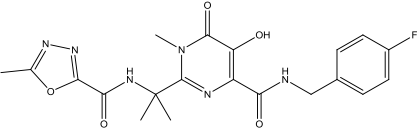   | Strand Transfer   | Approved by FDA 1n 2007    |
| EVG                                                                             |    | Strand Transfer   | Phase III                  |
| DTG                                                                             |    | Strand Transfer   | Phase III                  |
| MK-2048                                                                         |   | Strand Transfer   | Phase 2b/ PREP microbicide |
| Compound 5 <sup>a</sup><br>(C <sub>20</sub> H <sub>16</sub> ClNO <sub>3</sub> ) |  | Strand Transfer   | Preclinical                |
| BI-C <sup>b</sup>                                                               |  | 3' Processing     | Phase Ia                   |
